# Supplementary material
Source: publisher site journal article supplement (https://www.dovepress.com/get_supplementary_file.php?f=348735.docx)
Supplement: Supplementary file 1 [file get_supplementary_file.php]

**Supplementary materials**

**Box S1** The Evidence-Based Medicine (EBM) Training Study

| **Background to the Training Study**  Physicians in training contribute to a fixed-variables large data collection focussed since 2018 on the topic of pain and discomfort in nursing home residents with cognitive impairment. They receive the research protocol and attend classes on how to collect the data while adhering to General Data Protection Regulation requirements when, for example, asking for informed consent and entering the data safely in an online Castor EDC module. The classes also cover how to develop a research question, validity and reliability of measurement instruments, how to collect and analyse the data. Data collection classes focus on how to correctly use measurements instruments, in particular specific tools to observe discomfort and pain in nursing home residents with dementia who might not be capable of self-report. PhD-level staff teaches EBM and each staff member supervises small-group work of two to four residents, advising and providing feedback on initial research questions, a draft analysis plan, etc.  **Goals of the Training Study**  • the resident is able to collect data in a thorough manner and process it correctly  • the resident is able to effectively manage the data collection problems that are particularly common in the long-term care for frail older people  • the resident is able to apply/use pain and discomfort observation measurement instruments  • the resident is able to identify a relevant clinical or methodological problem related to pain and discomfort and translate it into a well-defined scientific research question that can be answered with the collected data (basic data set and any feasible additional data set)  • the resident is able to produce a sound scientific report  • the resident is able to present scientific data in a sound manner  **Design of the Training Study**  Quantitative cohort study with mostly observational assessments. The residents have access to patients and family to ask for informed consent, and each resident collects data on five nursing home patients they care for or they train nursing staff to help collect data. Two identical assessments about 2 months apart allow for assessing changes in the patient’s condition over time. |
| --- |

**Box S2** Interview Guide

| Introduction  Thank you very much for your willingness to participate in this study. I am [name, profession]. [additional interviewer explains: I have been asked by [Dr....], who is doing this study in collaboration with [Dr.....], to conduct the interview.] We would like to know what you think about doing scientific research in general and, more specifically, we want to evaluate the training study part of [*name institute*] EBM training program. A thorough evaluation is important in order to be able to improve the education. So whether your evaluation leans towards the positive or more towards the negative: we want to hear your views. What you tell us will not get back to (other) parties involved in the teaching of “elderly care” medicine residents or of [*name institute*]. It will not be shared with staff members who will assess you and will in no way play a part in your assessment. So please feel free to give your opinion.  Have you had the opportunity to read the information letter? Do you have any questions about it?  *(if necessary, go over the information letter and answer any questions)*  Now we will both sign the consent form. *(NB the respondent may have received the questionnaire first, and then be interviewed. The form does not need to be re-signed if it was already signed at the time, and the selected respondents also provided consent for the interview. However, you can go over the letter again and answer questions).*  Ask open-ended questions, with follow-up questions when possible:   - What makes you want to become an “elderly care” physician? And what made you decide to train as an “elderly care” physician in [*city institute*]?   *(NB background: Three institutes provide the training program. Apart from* [*city institute*] *also [institutes and partner institutes in 4 other cities].*   - What ideal do you want to pursue as “elderly care” medicine resident? - What is the first thing that comes to mind when you think about science? And when you think about the training study?   -Depending on the association mentioned 🡪 you indicate ... can you expand on that?   - Do you have ambitions in the field of postgraduate scientific research?   -if yes: do you want to combine doing research with, for example, medical practice or teaching?  -if yes: what conditions would this combination have to meet?  -if you do not want to do research: can you explain briefly?   - What were your expectations regarding the training study part of [*name institute*] EBM education program for “elderly care” medicine residents at the start of the program? - What do you think is important about the (entire) EBM education program for “elderly care” medicine residents? - What do you think is important about the training study part of the EBM program for “elderly care” medicine residents?   *(NB background: various resident programs offer scientific internships, but no scientific internships in a group setting, like* [*city institute*] *does offer to the “elderly care” medicine residents)*   - How do you think scientific research could make you a better doctor? - And did your expectations or opinion about the training study part of the EBM program for “elderly care” medicine residents change during the course of the program? What were your experiences?   -If an “elderly care” medicine resident has recently finished the program: How do you look back on the training study part of the EBM education program for “elderly care” physicians, now that you have just finished this course? *(NB Background: group of March 2018, some could be finished by then)*?  -was the effort commensurate with what it yielded?  -was the guidance offered sufficient?   - Is there anything we have not discussed, but which is important in order to improve EBM education? Do you want to tell us more about that? - In conclusion: How do you feel about sharing some of your experiences with the training study? |
| --- |

**Table S1** Outline of the Survey Instrument (translation from Dutch by a professional bi-lingual translator)

| 1. General | 1. Demographics, training and experience as a physician  2. Training and experience in research  • Do you have a PhD? If so, year and discipline/field?  • Are you interested in obtaining a PhD at some point? (response options: yes, perhaps, no)  • Do you have experience doing research? If so, what kind of experience and for how long? (open-ended item) |
| --- | --- |
| 1. Your opinion on scientific research in general | See scale items in Table S2. Instruction:  Please read each statement carefully and indicate the extent to which you recognize yourself in it. Circle the number that applies to you, 1 being ‘totally disagree’ and 7 being ‘totally agree’.    Response options for each item were numerical along with symbolic descriptors at the end points and in the middle:  --- -/+ +++  1 2 3 4 5 6 7 We also provided instruction with verbal descriptors for end points: 1 (totally disagree) and 7 (totally agree). |
| 1. What you think of the Evidence Based Medicine (EBM) training study | **•** What activities have you carried out or will you be carrying out within the framework of the EBM training study?  (please tick which activities, can also be in a group setting)   |  | done | to be done | | --- | --- | --- | | formulate (research) question |  |  | | collect data and use observation measurement instruments |  |  | | analyze data |  |  | | write down findings in report |  |  | | (intention) of writing article for publication |  |  | | present your work |  |  |   • What were your expectations regarding the EBM training study when you started the training program?  (open-ended item; 7 lines A4 paper survey)  • What is you experience with the EBM training study so far? (open-ended item; 8 lines A4 paper survey)  • Do you have any additional comments and/or suggestions? (open-ended item; 7 lines A4 paper survey) |

**Table S2** Perceptions of Research and Motivation Scales in English and Dutch Adaptations (translated and back-translated by professional translator) and Justifications

| English (Ommering et al.6 backward-forward translation from other instruments) | Dutch (Ommering et al. Supplement)6 | English in study among “elderly care” residents (order in survey) | Dutch in study among “elderly care” residents | Justification for adaptation |
| --- | --- | --- | --- | --- |
| **Perceptions of research (5 items)** | | | | |
| It is important for medical professionals to have scientific skills | Wetenschappelijke vaardigheden zijn belangrijk voor het artsenberoep | It is important for elderly care physicians to have scientific skills (B9) | Wetenschappelijke vaardigheden zijn belangrijk voor de specialist ouderengeneeskunde | Refer to their own discipline as the respondents are in training to become a certified elderly care physician |
| A scientific educational programme is important for me | Een wetenschappelijke opleiding is belangrijk voor mij | No adaptation (B10) | No adaptation | N/A |
| I enjoy the attention paid to science in this course | Ik vind aandacht voor wetenschap in de opleiding leuk | No adaptation (B11) | No adaptation | N/A |
| Medical education should be scientific | De opleiding geneeskunde hoort wetenschappelijk te zijn | The elderly care physician training program should be scientific (B12) | De opleiding tot specialist ouderengeneeskunde hoort wetenschappelijk te zijn | Refer to their own discipline as the respondents are in training to become a certified elderly care physician |
| A doctor should be able to independently do research | Een arts zou zelfstandig onderzoek moeten kunnen doen | An elderly care physician should be able to do research independently (B13) | Een specialist ouderengeneeskunde zou zelfstandig onderzoek moeten kunnen doen | Refer to their own discipline as the respondents are in training to become a certified elderly care physician |
| **Intrinsic motivation (5 items)** | | | | |
| Doing research is interesting | Het doen van onderzoek vind ik interessant | No adaptation (B1) | No adaptation | The item in Dutch (I feel) is more personal but sufficiently close and obvious from the context |
| Doing research is fun | Het doen van onderzoek vind ik leuk | No adaptation (B2) | No adaptation | The item in Dutch (I feel) is more personal but sufficiently close and obvious from the context |
| Doing research is challenging | Het doen van onderzoek vind ik uitdagend | Corrected translation of the Dutch item:  I view doing research as a challenge or an exciting challenge* (B3) | No adaptation (of Dutch only) | The Dutch translation which we used covered a positive connotation around “challenging” which should be included in the English item as well |
| I like solving puzzles and problems | Ik houd van het oplossen van puzzels en problemen | No adaptation (B4) | No adaptation | N/A |
| I am able to develop myself by doing research | Door het doen van onderzoek kan ik mezelf verder ontwikkelen | No adaptation (B5) | No adaptation | N/A |
| **Extrinsic motivation (4 items)** | | | | |
| I think doing research is useful for my resume | Ik denk dat het doen van onderzoek goed is voor mijn CV | No adaptation (B6) | No adaptation | N/A |
| I think that doing research could help me to distinguish myself from others | Ik denk dat ik mij dankzij het doen van onderzoek kan onderscheiden van anderen | No adaptation (B7) | No adaptation | N/A |
| I think that doing research could help me to get a good job in the future | Ik denk dat het doen van onderzoek mij helpt om later een goede baan te krijgen | No adaptation (B8) | No adaptation | N/A |
| I think doing research improves my chances for my preferred residency spot | Ik denk dat het doen van onderzoek mijn kansen vergroot op de specialisatie die ik wil | Not included | Not included | Item omitted because not relevant for residents |

**Note.** *The literal translation of challenging in Dutch can be interpreted as a negative experience (challenge) but also, and perhaps more so, as a positive experience (exciting challenge). We therefore did not reverse code the item for the total score.

**Table S3** Revisions in Survey Scales in Follow-Up Research Based on The Mixed-Methods Study among “Elderly Care” Residents

| English (Ommering et al.6 backward-forward translation from other instruments) | Dutch (Ommering et al. Supplement)6 | English in study among “elderly care” residents (order in survey) | Dutch in study among “elderly care” residents | Justification for adaptation |
| --- | --- | --- | --- | --- |
| **Intrinsic motivation (added 6th item to follow-up survey)** | | | | |
| Not included | Not included | Conducting research myself is important because it helps improve my practice (B17)* | Zelf onderzoek doen is belangrijk want het helpt om mijn praktijk te verbeteren | This main motivation emerged from the interviews and was not included in the scale |
| **Self-efficacy scale (9 items)** | | | | |
| I trust my ability to solve problems | Ik vertrouw op mijn vermogen om problemen op te lossen | Not included | Not included | These items do not refer to research specifically, and in the intrinsic motivation scale, the non-specific item “I like solving puzzles and problems” was an outlier and considering the interview findings, this may actually refer more to motivation to become an “elderly care” physician |
| When confronted with a problem, I usually see multiple solutions | Als ik geconfronteerd word met een probleem zie ik meestal meerdere oplossingen | Not included | Not included |
| I can solve most problems when I put effort into them | Ik kan de meeste problemen oplossen als ik er moeite voor doe | Not included | Not included |
| I’m certain I can master the skills taught in my study this year | Ik ben er van overtuigd dat ik de vaardigheden die ik dit studiejaar moet leren, onder de knie krijg | Not included | Not included |
| I can do even the hardest work within my study if I try | Ik kan zelfs de moeilijkste stof binnen deze studie aan, als ik het maar probeer | Not included | Not included |
| I can do almost all the work in my study if I don’t give up | Zolang ik niet opgeef, kan ik bijna alle stof binnen deze studie aan | Not included | Not included |
| I feel I am good in doing research | Ik denk dat ik goed ben in het doen van onderzoek | No adaptation (B14) | No adaptation | N/A |
| I feel I am competent enough to do research | Ik voel me competent genoeg om onderzoek te doen | No adaptation (B15) | No adaptation | N/A |
| I feel I master the skills to do research | Ik denk dat ik de vaardigheden bezit om onderzoek te kunnen doen | No adaptation (B16) | No adaptation | N/A |

* translated and back-translated by professional translator
